# Supplementary material for: Construction and simulation of the Bradyrhizobium diazoefficiens USDA110 metabolic network: a comparison between free-living and symbiotic states
Source: Royal Society of Chemistry journal article supplement (doi:10.1039/c6mb00553e), 2017-01-31
Supplement: c6mb00553e2.pdf [file c6mb00553e2.pdf]

# **Construction and Simulation of *Bradyrhizobium diazoefficiens* USDA110 Metabolic Network: Comparison between the Free-living and Symbiotic States**

Yi Yang, Xiao-Pan Hu, Bin-Guang Ma \*

Hubei Key Laboratory of Agricultural Bioinformatics, College of Informatics, State Key Laboratory of Agricultural Microbiology, Huazhong Agricultural University, Wuhan 430070, China

\* Address correspondence to Bin-Guang Ma, [mbg@mail.hzau.edu.cn](mailto:mbg@mail.hzau.edu.cn).

Supplementary Contents:

Supplementary Table S1-S6.

Supplementary Figures S1-S4.

Supplementary Method.

Supplementary Files S1-S6.

## Supplementary Information

### Supplementary tables

**Table S1.** Basic properties of *iYY1101*

| Features                  | <i>iYY1101</i> |
|---------------------------|----------------|
| Compartment               | 2              |
| Genes                     | 1101           |
| Metabolites               | 661            |
| Cytoplasmic metabolites   | 660            |
| Extracellular metabolites | 106            |
| Reaction                  | 1031           |
| Metabolic reactions       | 821            |
| Cytoplasmic reactions     | 810            |
| Extracellular reactions   | 11             |
| Irreversible              | 520            |
| Reversible                | 301            |
| Spontaneous               | 22             |
| Transport reactions       | 106            |
| Exchange reactions        | 99             |
| Sink reactions            | 3              |
| Objective function        | 5              |
| Associated with genes     | 715            |
| Not associated with genes | 316            |

**Table S2.** Essential gene predicted in the FL state

| Essential gene |         |         |         |         |         |         |         |
|----------------|---------|---------|---------|---------|---------|---------|---------|
| bll0006        | bll1476 | bll5072 | bll6605 | blr0515 | blr1315 | blr3302 | blr5099 |
| bll0187        | bll2399 | bll5331 | bll6606 | blr0581 | blr1381 | blr3307 | blr6489 |
| bll0188        | bll2481 | bll5379 | bll6607 | blr0650 | blr1383 | blr3312 | blr6490 |
| bll0477        | bll3807 | bll5521 | bll7272 | blr0653 | blr1393 | blr3797 | blr6784 |
| bll0522        | bll4423 | bll5919 | bll7408 | blr0683 | blr1479 | blr3884 | blr7371 |
| bll0549        | bll4585 | bll6497 | bll7514 | blr0685 | blr1481 | blr4088 | blr7377 |
| bll0566        | bll4608 | bll6501 | bll7752 | blr0716 | blr1482 | blr4119 | blr7382 |
| bll0822        | bll4758 | bll6510 | bll7953 | blr0738 | blr1483 | blr4362 | blr7454 |
| bll1396        | bll4800 | bll6512 | bll7969 | blr0745 | blr1484 | blr4810 | blr7524 |
| bll1418        | bll4805 | bll6595 | bll8126 | blr0746 | blr1485 | blr4842 | blr7525 |
| bll1419        | bll4847 | bll6600 | blr0216 | blr1120 | blr1499 | blr4843 | blr8104 |
| bll1421        | bll4849 | bll6601 | blr0512 | blr1140 | blr2398 | blr4844 | blr8106 |
| bll1422        | bll4852 | bll6602 | blr0513 | blr1228 | blr2489 | blr5037 | blr8134 |
| bll1475        | bll4856 | bll6604 | blr0514 | blr1256 | blr2631 |         |         |

**Table S3.** Essential gene predicted in the SNF state

| Essential gene |         |         |         |         |         |         |         |
|----------------|---------|---------|---------|---------|---------|---------|---------|
| bll0566        | bll3461 | blr1744 | blr1761 | blr1774 | blr2764 | blr3731 | bsr1757 |
| bll2399        | bll7752 | blr1745 | blr1769 | blr2037 | blr2766 | blr4486 | bsr1775 |
| bll2481        | blr0468 | blr1746 | blr1770 | blr2038 | blr2768 | blr5037 | bsr2765 |
| bll2759        | blr0469 | blr1747 | blr1771 | blr2398 | blr2769 | bsr0470 | bsr2770 |
| bll2760        | blr1743 | blr1759 | blr1773 | blr2763 | blr3730 |         |         |

**Table S4.** Essential genes associated with symbiotic nitrogen fixation detected by simulated single-gene-deletion

| Synonym code | Gene name   | Description                                               | EC number | Pathway                              |
|--------------|-------------|-----------------------------------------------------------|-----------|--------------------------------------|
| blr2037      | <i>nifA</i> | Nif-specific regulatory protein                           | -         | Nitrogen metabolism                  |
| blr1759      | <i>nifB</i> | FeMo cofactor biosynthesis protein                        | -         | Nitrogen metabolism                  |
| blr1743      | <i>nifD</i> | Nitrogenase molybdenum-iron protein subunit alpha         | 1.18.6.1  | Nitrogen metabolism                  |
| blr1745      | <i>nifE</i> | Nitrogenase molybdenum-cofactor synthesis protein         | -         | Nitrogen metabolism                  |
| blr1769      | <i>nifH</i> | nitrogenase reductase                                     | 1.18.6.1  | Nitrogen metabolism                  |
| blr1744      | <i>nifK</i> | Nitrogenase molybdenum-iron protein subunit beta          | 1.18.6.1  | Nitrogen metabolism                  |
| blr1746      | <i>nifN</i> | Nitrogenase molybdenum-cofactor biosynthesis protein NifN | -         | Nitrogen metabolism                  |
| blr1770      | <i>nifQ</i> | Molybdenum processing protein                             | -         | Nitrogen metabolism                  |
| blr4486      | <i>nifR</i> | Nitrogen regulation protein                               | -         | Nitrogen metabolism                  |
| blr1771      | <i>nifW</i> | Nitrogenase stabilizing/protective protein                | -         | Nitrogen metabolism                  |
| blr1747      | <i>nifX</i> | Iron-molibdenum cofactor processing protein               | -         | Nitrogen metabolism                  |
| blr1761      | <i>nifZ</i> | Iron-sulfur cofactor synthesis protein                    | -         | Nitrogen metabolism                  |
| blr2038      | <i>fixA</i> | Electron transfer flavoprotein subunit beta               | -         | Nitrogen metabolism                  |
| blr1773      | <i>fixB</i> | Electron transfer flavoprotein subunit alpha              | -         | Nitrogen metabolism                  |
| blr1774      | <i>fixC</i> | Electron transfer flavoprotein-quinone oxidoreductase     | 1.5.5.-   | Nitrogen metabolism                  |
| blr2768      | <i>fixH</i> | -                                                         | -         | Nitrogen metabolism                  |
| blr2769      | <i>fixI</i> | E1-E2 type cation ATPase                                  | 3.6.3.4   | Nitrogen metabolism                  |
| bll2759      | <i>fixJ</i> | Response regulator FixJ                                   | -         | Nitrogen metabolism                  |
| bll2760      | <i>fixL</i> | Two-component oxygen-sensor histidine kinase              | 2.7.13.3  | Nitrogen metabolism                  |
| blr2763      | <i>fixN</i> | Cbb3-type cytochrome c oxidase subunit I                  | 1.9.3.1   | Nitrogen metabolism                  |
| blr2764      | <i>fixO</i> | Cbb3-type cytochrome c oxidase subunit II                 | 1.9.3.1   | Nitrogen metabolism                  |
| blr2766      | <i>fixP</i> | Cbb3 oxidase subunit III                                  | -         | Nitrogen metabolism                  |
| bsr2765      | <i>fixQ</i> | Cbb3 oxidase subunit IV                                   | -         | Nitrogen metabolism                  |
| bsr2770      | <i>fixS</i> | -                                                         | -         | Nitrogen metabolism                  |
| bsr1757      | <i>fixU</i> | Nitrogen fixation protein                                 | -         | Nitrogen metabolism                  |
| bsr1775      | <i>fixX</i> | Ferredoxin                                                | -         | Nitrogen metabolism                  |
| bll3461      | <i>pcaJ</i> | 3-oxoadipate CoA-transferase subunit B                    | 2.8.3.8   | Propanoate metabolism                |
| blr5037      | <i>hemB</i> | Delta-aminolevulinic acid dehydratase                     | 4.2.1.24  | Porphyrin and chlorophyll metabolism |
| blr2398      | <i>hemC</i> | Porphobilinogen deaminase                                 | 2.5.1.61  | Porphyrin and chlorophyll metabolism |
| bll2399      | <i>hemE</i> | Uroporphyrinogen decarboxylase                            | 4.1.1.37  | Porphyrin and chlorophyll metabolism |
| bll2481      | <i>hemF</i> | Coproporphyrinogen III oxidase                            | 1.3.3.3   | Porphyrin and chlorophyll metabolism |
| bll7752      | <i>hemH</i> | Ferrochelatase                                            | 4.99.1.1  | Porphyrin and chlorophyll metabolism |
| bll0566      | -           | Uroporphyrinogen III synthase                             | 4.2.1.75  | Porphyrin and chlorophyll metabolism |
| blr0468      | <i>ccmB</i> | Heme exporter protein B                                   | -         | ABC transporters                     |
| blr0469      | <i>ccmC</i> | Heme exporter protein C                                   | -         | ABC transporters                     |
| bsr0470      | <i>ccmD</i> | Heme exporter protein D                                   | -         | ABC transporters                     |
| blr3730      | <i>dctB</i> | C4-dicarboxylate transport sensor histidine kinase DctB   | 2.7.13.3  | Two-component system                 |
| blr3731      | <i>dctD</i> | C4-dicarboxylate transport sensor histidine kinase DctD   | 2.7.13.3  | Two-component system                 |

**Table S5.** Essential gene pairs predicted in the FL state

| Essential gene pairs |                 |                 |                 |
|----------------------|-----------------|-----------------|-----------------|
| bll0007-bll4274      | bll4389-blr3778 | blr0428-blr8101 | blr3755-blr2585 |
| bll0416-blr0488      | bll4607-blr1632 | blr0428-blr4385 | blr3755-blr2586 |
| bll0466-blr5690      | bll5033-blr5751 | blr0429-blr0206 | blr3792-bll6435 |
| bll0501-blr4687      | bll5464-bll1630 | blr0429-blr8101 | blr3796-bll6631 |
| bll1200-blr4838      | bll5610-blr3972 | blr0429-blr4385 | blr3989-bll0553 |
| bll1200-blr3552      | bll5785-blr1119 | blr0495-bll0415 | blr4582-blr1098 |
| bll1631-bll5465      | bll5968-bll5145 | blr0654-blr0652 | blr5101-bll5021 |
| bll2049-blr4809      | bll7052-bll0466 | blr0655-blr1323 | blr5747-blr5690 |
| bll2654-bll4746      | bll7596-blr5702 | blr0739-bll4859 | blr5747-bll7052 |
| bll4070-blr5702      | bll7967-bll4570 | blr1326-blr3294 | blr6225-bll1397 |
| bll4070-bll7596      | bll8013-blr0744 | blr1488-blr7029 | blr6298-bll6010 |
| bll4124-blr7471      | blr0428-blr0206 | blr2582-blr3755 |                 |

**Table S6.** Essential gene pairs predicted in the SNF state

| Essential gene pairs |                 |                 |                 |
|----------------------|-----------------|-----------------|-----------------|
| bll0439-blr0512      | bll0442-blr0512 | bll0453-bll0441 | blr0512-bll1188 |
| bll0439-blr0513      | bll0442-blr0513 | bll0453-bll0442 | blr0513-bsl1187 |
| bll0439-blr0514      | bll0442-blr0514 | bll0453-bll0443 | blr0513-bll1188 |
| bll0439-blr0515      | bll0442-blr0515 | bll0455-bsl1187 | blr0514-bsl1187 |
| bll0440-blr0512      | bll0443-blr0512 | bll0455-bll1188 | blr0514-bll1188 |
| bll0440-blr0513      | bll0443-blr0513 | bll0455-bll0439 | blr0515-bsl1187 |
| bll0440-blr0514      | bll0443-blr0514 | bll0455-bll0440 | blr0515-bll1188 |
| bll0440-blr0515      | bll0443-blr0515 | bll0455-bll0441 | blr1488-blr7029 |
| bll0441-blr0512      | bll0453-bsl1187 | bll0455-bll0442 | blr2036-bll2623 |
| bll0441-blr0513      | bll0453-bll1188 | bll0455-bll0443 | blr2767-blr5778 |
| bll0441-blr0514      | bll0453-bll0439 | bll0466-bll1200 | blr5747-bll1200 |
| bll0441-blr0515      | bll0453-bll0440 | blr0512-bsl1187 |                 |

## Supplementary figures

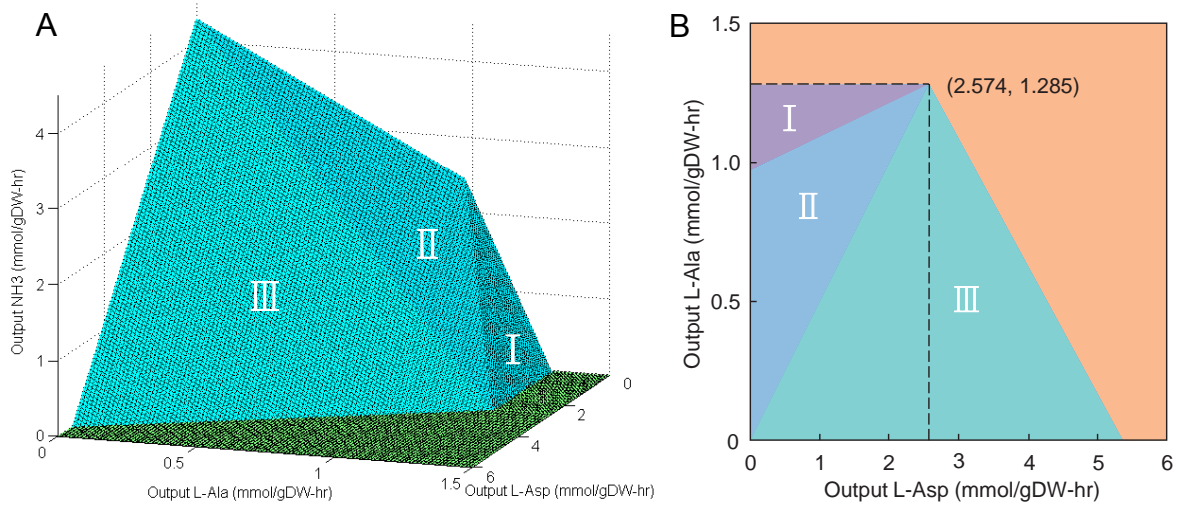

**Fig. S1.** Phenotype phase plane for the three kinds of nitrogen output,  $\text{NH}_3$ , L-alanine and L-aspartate, and the trade-offs between them. The phase planes are shown in 3D plot (A) and 2D plot (B), respectively. Regions denoted by I, II and III characterize different quantitative output modes of  $\text{NH}_3$  influenced by the output fluxes of L-alanine and L-aspartate. The SNF metabolic system has maximum nitrogen output rate at the intersecting line of plane II and III (A), *i.e.*, when the output ratio of L-aspartate and L-alanine was 2.574 : 1.285 = 2 : 1, the SNF system has maximum nitrogen output.

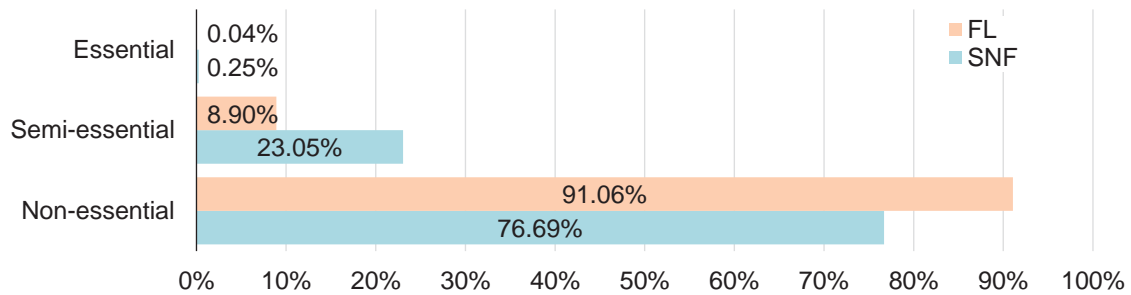

**Fig. S2.** The proportions of gene pairs with different lethality in different metabolic models. FL, free living; SNF, symbiotic nitrogen fixation.

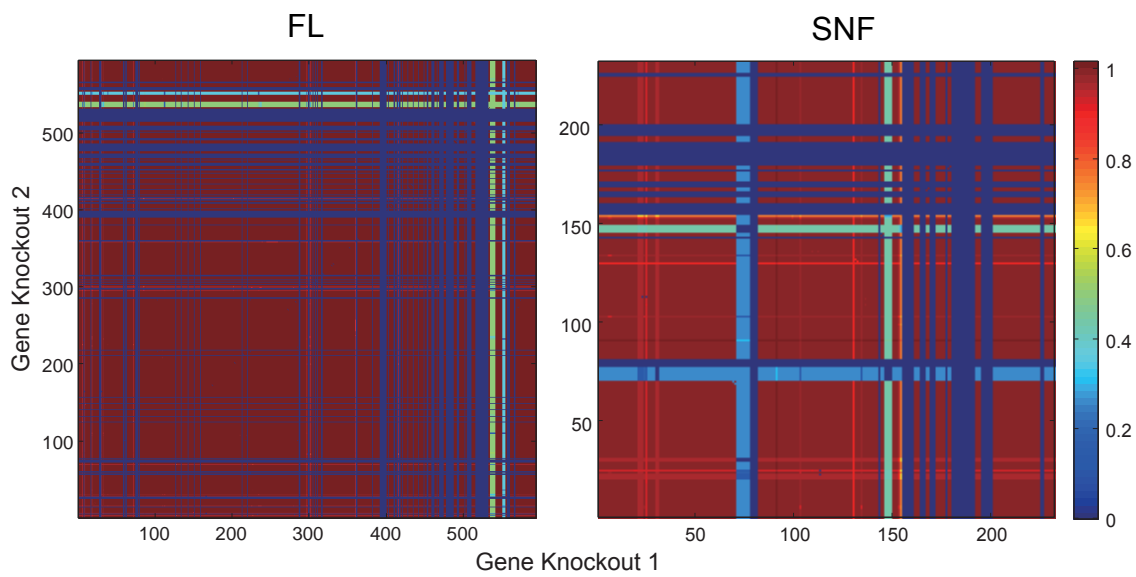

**Fig. S3.** Simulated double-gene-knockout to the FL and SNF models. Only genes proved to be related with fluxes by FVA were considered. Colors represent the ratio of optimal value of objective function of a double-gene-deletion strain to that of the wild-type strain.

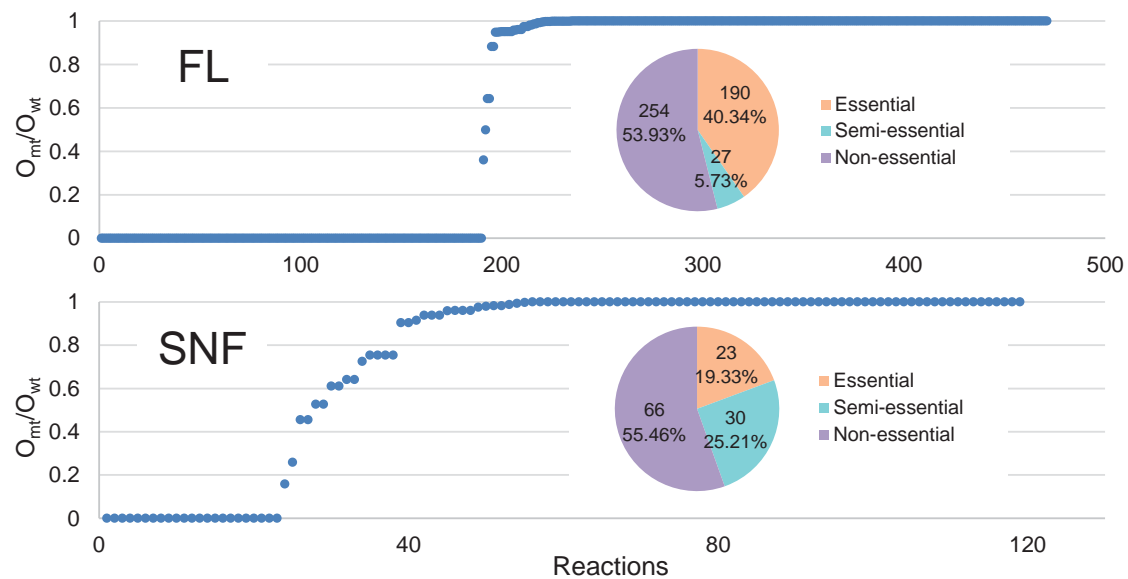

**Fig. S4.** Simulated single-reaction-knockout to the FL and SNF models. The horizontal axis represents reactions in the metabolic models; only reactions proved to be related with fluxes by FVA were considered; the vertical axis represents the ratio of optimal value of objective function of a single-reaction-deletion strain to that of the wild-type strain.  $O_{mt}/O_{wt}$ , the ratio of the optimal objective function value for a single reaction-deletion strain to that for the wild-type strain. Pie charts show the proportions of three kinds of reactions: essential, semi-essential and non-essential.

**Supplementary Methods:** Method of determining the biomass objective function for *B. diazoefficiens* USDA110

All of the free-living and normally-growing microorganisms need to maintain the biomass synthesis, so the biomass reaction was used as the objective function (OF) of the FL model for the free-living rhizobium. Determining biomass reaction means determining all known biomass constituents and their fractional contributions to the overall cellular biomass and energy consumption during biomass synthesis which includes growth-associated ATP maintenance (GAM) and non-growth-associated ATP maintenance (NGAM). In this study, all of them were determined by literature mining step by step.

**1 Biomass composition of *B. diazoefficiens***

Through mining and integrating information in literatures (1-6), Biomass composition of *B. diazoefficiens* USDA 110 was determined (Table 1).

**Table 1 Biomass composition of *B. diazoefficiens***

| Component                                                           | Cellular content% (w/w) | References |
|---------------------------------------------------------------------|-------------------------|------------|
| Protein                                                             | 50.1                    | (4,5)      |
| DNA                                                                 | 3.0                     | (1, 2)     |
| RNA                                                                 | 8.5                     | (1, 2)     |
| Phospholipids                                                       | 0.9                     | (3, 4)     |
| Poly-beta-Hydroxybutyrate (PHB)                                     | 15.9                    | (3)        |
| Peptidoglycan                                                       | 2.5                     | (6)        |
| Lipopolysaccharides (LPS)                                           | 3.4                     | (6)        |
| Capsular polysaccharide & Extracellular polysaccharides (CPS & EPS) | 15.7                    | (5)        |
| Total                                                               | 100                     | -          |

We suppose the total DNA content of a single cell is approximately equal to the DNA content of biomass.

$$\text{DNA content of a single cell} = 9.1 \times 10^{-15} \text{ g (1)}$$

$$\text{Cell volume} = \pi \times (0.4)^2 \times 2 = 1.0048 (\mu\text{m})^3 \text{ (7)}$$

We suppose the cell density equals to the density of water and the moisture content of cell is 70% (8), thus the proportion of DNA in biomass is:

$$9.1 \times 10^{-15} / [1.0048 \times 10^{-12} \times (1 - 0.70)] = 3.02\%$$

**2 Amino acid component proportions of *B. diazoefficiens* biomass**

Amino acid composition (mol%) of proteins in *B. diazoefficiens* has been measured (9); the proportions of amino acids in biomass is (using L-Ala as an example):

$$\text{Content (mmol/g DW)} = 12.2\% \times 50.1\% \times 1000 / 107.602 = 0.568 \text{ mmol/g DW}$$

The proportions of amino acids in *B. diazoefficiens* biomass were shown in Table 2.

**Table 2 Amino acid component proportions of *B. diazoefficiens* biomass**



| Component | Composition (mol%) <sup>a)</sup> | MM(g/mol) | Modified MM(g/mol) <sup>b)</sup> | Weight (g (if total 1 mol Amino acid)) | Content (mmol/g DW) |
|-----------|----------------------------------|-----------|----------------------------------|----------------------------------------|---------------------|
| L-Ala     | 12.2                             | 89        | 71                               | 8.653                                  | 0.568               |
| L-Arg     | 4.3                              | 175       | 157                              | 6.744                                  | 0.200               |
| L-Asn     | 4.5                              | 132       | 114                              | 5.125                                  | 0.210               |
| L-Asp     | 4.5                              | 132       | 114                              | 5.125                                  | 0.210               |
| L-Cys     | 0.5                              | 121       | 103                              | 0.514                                  | 0.023               |
| L-Gln     | 5.2                              | 146       | 128                              | 6.649                                  | 0.242               |
| L-Glu     | 5.2                              | 146       | 128                              | 6.649                                  | 0.242               |
| Gly       | 9.3                              | 75        | 57                               | 5.296                                  | 0.433               |
| L-His     | 1.6                              | 155       | 137                              | 2.190                                  | 0.074               |
| L-Ile     | 4.5                              | 131       | 113                              | 5.080                                  | 0.210               |
| L-Leu     | 7.4                              | 131       | 113                              | 8.354                                  | 0.345               |
| L-Lys     | 9.0                              | 147       | 129                              | 11.598                                 | 0.419               |
| L-Met     | 2.7                              | 149       | 131                              | 3.533                                  | 0.126               |
| L-Phe     | 3.7                              | 165       | 147                              | 5.434                                  | 0.172               |
| L-Pro     | 3.8                              | 115       | 97                               | 3.682                                  | 0.177               |
| L-Ser     | 6.3                              | 105       | 87                               | 5.476                                  | 0.293               |
| L-Thr     | 5.4                              | 119       | 101                              | 5.449                                  | 0.251               |
| L-Trp     | 0.5                              | 204       | 186                              | 0.929                                  | 0.023               |
| L-Tyr     | 2.7                              | 181       | 163                              | 4.397                                  | 0.126               |
| L-Val     | 6.8                              | 117       | 99                               | 6.725                                  | 0.317               |
| Total     | 100.1                            | -         | -                                | 107.602                                | 4.661               |

MM: Molecular Mass

<sup>a)</sup> In relevant literatures, composition of cysteine is ‘trace’; tryptophan data is absent; aspartate and asparagine are represented by ‘aspartic acid’; glutamate and glutamine are represented by ‘glutamic acid’. Assume both of the composition of cysteine and tryptophan are 0.5%; composition of aspartate and asparagine are equivalent; so as to glutamate and glutamine.

<sup>b)</sup> During protein synthesis process, addition of one amino acid is accompanied with one H<sub>2</sub>O loss, so the modified molar mass = molar mass of amino acid - molar mass of water.

### 3 ODNs component proportions of *B. diazoefficiens* biomass

The GC-content of *B. diazoefficiens* USDA110 is 64.1% (10). We suppose biomass has equal proportions of G and C as well as A and T, and the proportions of deoxynucleotides (ODNs) in *B. diazoefficiens* biomass were shown in Table 3.

**Table 3 ODNs component proportions of *B. diazoefficiens* biomass**

| Component | Composition (mol%) | MM(g/mol) | Modified MM(g/mol) <sup>a)</sup> | Weight (g (if total 1 mol DNA)) | Content (mmol/g DW) |
|-----------|--------------------|-----------|----------------------------------|---------------------------------|---------------------|
|-----------|--------------------|-----------|----------------------------------|---------------------------------|---------------------|

|       |     |     |     |        |        |
|-------|-----|-----|-----|--------|--------|
| dAMP  | 18  | 331 | 313 | 56.34  | 0.0175 |
| dCMP  | 32  | 307 | 289 | 92.48  | 0.0311 |
| dGMP  | 32  | 347 | 329 | 105.28 | 0.0311 |
| dTMP  | 18  | 322 | 304 | 54.72  | 0.0175 |
| Total | 100 | -   | -   | 308.82 | -      |

<sup>a)</sup> During DNA synthesis process, addition of one deoxyribonucleotide is accompanied with one H<sub>2</sub>O loss, so the modified molar mass = molar mass of deoxyribonucleotides - molar mass of water.

#### 4 Nucleotide component proportions of *B. diazoefficiens* biomass

We suppose the total RNA of *B. diazoefficiens* USDA110 only contains rRNA, tRNA and mRNA, and their proportions in the total RNA were 80%, 15% and 5%, respectively (11-13). The proportions of nucleotides of rRNAs, tRNAs and mRNAs were obtained from NCBI ([ftp://ftp.ncbi.nlm.nih.gov/genomes/Bacteria/Bradyrhizobium\\_diazoefficiens\\_USDA\\_110\\_uid57599/](ftp://ftp.ncbi.nlm.nih.gov/genomes/Bacteria/Bradyrhizobium_diazoefficiens_USDA_110_uid57599/)). The proportions of nucleotides in *B. diazoefficiens* biomass were shown in Table 4.

**Table 4 Nucleotide component proportions of *B. diazoefficiens* biomass**

| Component | Composition (mol%) | MM(g/mol) | Modified MM(g/mol) <sup>a)</sup> | Weight (g (if total 1 mol RNA)) | Content (mmol/g DW) |
|-----------|--------------------|-----------|----------------------------------|---------------------------------|---------------------|
| AMP       | 24.0               | 347       | 329                              | 78.96                           | 0.0631              |
| CMP       | 24.7               | 323       | 305                              | 75.335                          | 0.0649              |
| GMP       | 31.1               | 363       | 345                              | 107.295                         | 0.0817              |
| UMP       | 20.2               | 324       | 306                              | 61.812                          | 0.0531              |
| Total     | 100                | -         | -                                | 323.402                         | -                   |

<sup>a)</sup> During RNA synthesis process, addition of one nucleotide is accompanied with one H<sub>2</sub>O loss, so the modified molar mass = molar mass of nucleotides - molar mass of water.

#### 5 Lipid component proportions of *B. diazoefficiens* biomass

Generally, composition of the lipids in biomass is relatively complex. As to *B. diazoefficiens*, the most abundant lipids is poly-beta-hydroxybutyrate (PHB), which may account for 15.9% of the dry weight of cell (3) and 81.7% of the total lipids (4). Other lipids include phospholipids, aliphatic hydrocarbons, free fatty acids and fatty alcohols. The main energy-storage substance in *B. diazoefficiens* is PHB, while glycerolipids that is the main energy-storage lipids in most organisms is rare in *B. diazoefficiens* (about 0.07% (w/w)) and can be ignored (4). Among other major lipids, phospholipids is the only one in biomass component; further, pathways related to aliphatic hydrocarbons and fatty alcohols metabolism were not included in our model, hence, it could be assumed that PHB and phospholipids were the exclusive components of lipids in *B. diazoefficiens*.

Compositions of phospholipids in *B. diazoefficiens* have been detected (14). Biosynthetic pathways related to long-chain, unsaturated and odd-chain fatty acids were not included in our model, therefore we suppose that the phospholipid molecules are only composed of hexadecanoic acids (C16:0). The proportions of phospholipids in *B. diazoefficiens* biomass were shown in Table 5.

**Table 5 Phospholipid component proportions of *B. diazoefficiens* biomass**

| Component <sup>a)</sup> | Composition (w/w) | MM(g/mol) | Content (mmol/g DW) |
|-------------------------|-------------------|-----------|---------------------|
| PE                      | 54.6              | 692       | 0.00710             |
| PC                      | 24.5              | 523       | 0.00422             |
| PG                      | 13.7              | 627       | 0.00197             |
| CL                      | 7.2               | 1354      | 0.00048             |
| Total                   | 100               | -         | -                   |

<sup>a)</sup> In relevant literature, mono-methyl-phosphatidylethanolamine (MMPE) is one of the components of phospholipid in *B. diazoefficiens* USDA110, but its proportion is small (3.4%) and the corresponding metabolic pathway is unknown, so it was treated as PE. PE: phosphatidylethanolamine, PC: phosphatidylcholine, PG: phosphatidylglycerol, CL: cardiolipin.

Precursors of PHB is (R)-3-Hydroxybutanoate whose molar mass is 104. During PHB synthesis process, addition of one (R)-3-Hydroxybutanoate is accompanied with one H<sub>2</sub>O loss, so proportion of PHB in *B. diazoefficiens* biomass is:

$$15.9\% \times 1000 / (104 - 18) = 1.8488 \text{ mmol/g DW}.$$

#### 6 Peptidoglycan component proportions of *B. diazoefficiens* biomass

Precursors of peptidoglycan is (N-acetylmuramoyl-(N-acetylglucosamine)-L-alanyl-D-glutamyl-meso-2,6-diaminopimeloyl-D-alanyl) in Gram-negative bacteria, whose molar mass is 981. During peptidoglycan synthesis process, addition of two monomers is accompanied with three H<sub>2</sub>O loss, so proportion of peptidoglycan in *B. diazoefficiens* biomass is:

$$2.5\% \times 1000 / (981 - 27) = 0.0262 \text{ mmol/g DW}.$$

#### 7 Lipopolysaccharide component proportions of *B. diazoefficiens* biomass

Lipopolysaccharides (LPS) in *B. diazoefficiens* USDA110 are composed of (lipid A) and polysaccharide side chains. Compositions of LPS in *B. diazoefficiens* have been detected (15). The proportions of compositions of LPS in *B. diazoefficiens* biomass were shown in Table 6.

**Table 6 LPS component proportions of *B. diazoefficiens* biomass**

| Component <sup>a)</sup> | Composition (w/w) | MM(g/mol) | Modified MM(g/mol) <sup>b)</sup> | Content (mmol/g DW) |
|-------------------------|-------------------|-----------|----------------------------------|---------------------|
| Fucose                  | 0.209             | 164       | 146                              | 0.0434              |
| Xylose                  | 0.056             | 150       | 132                              | 0.0126              |
| Arabinose               | 0.053             | 150       | 132                              | 0.0121              |
| Mannose                 | 0.198             | 180       | 162                              | 0.0373              |
| Glucose                 | 0.065             | 180       | 162                              | 0.0123              |
| Glucosamine             | 0.026             | 179       | 161                              | 0.0049              |
| Galacturonate           | 0.070             | 194       | 176                              | 0.0122              |
| KDO <sup>c)</sup>       | 0.019             | 238       | 220                              | 0.0027              |
| Lipid A                 | 0.305             | 1797      | 1797                             | 0.0058              |
| Total                   | 1.000             | -         | -                                | -                   |

a) In relevant literatures, the metabolic pathways of fucosamine and quinovosamine are unknown and proportion of quinovosamine is small, so quinovosamine is not considered and fucosamine is treated as fucose.

b) During LPS synthesis process, addition of one monosaccharide is accompanied with one H<sub>2</sub>O loss, so the modified molar mass = molar mass of monosaccharide - molar mass of water.

c) KDO: 2-Keto-3-Deoxy-D-manno-Octonate.

## 8 CPS and EPS component proportions of *B. diazoefficiens* biomass

Capsular polysaccharide (CPS) and extracellular polysaccharides (EPS) can be secreted by *B. diazoefficiens* USDA110 when it is cultured on a medium containing carbohydrates. Their compositions and the proportion of each component are almost the same (15, 16), so they can be combined as one component. Biosynthetic pathways of one of the key components of CPS and EPS, 4-O-methyl-galactose, was not included in our model, however, it can be treated as galactose. Compositions of CPS and EPS in *B. diazoefficiens* have been detected (15-17). The proportions of CPS and EPS in *B. diazoefficiens* biomass were shown in Table 7.

**Table 7 CPS and EPS component proportions of *B. diazoefficiens* biomass**

| Component                   | Composition (mol%) | MM(g/mol) | Modified MM(g/mol) <sup>a)</sup> | Weight (g (if total 1 mol CPS or EPS)) | Content (mmol/g DW) |
|-----------------------------|--------------------|-----------|----------------------------------|----------------------------------------|---------------------|
| Mannose                     | 19.73              | 180       | 153                              | 30.19                                  | 0.185               |
| Galactose                   | 18.94              | 180       | 153                              | 28.98                                  | 0.177               |
| Glucose                     | 41.93              | 180       | 153                              | 64.16                                  | 0.393               |
| Galacturonate               | 19.39              | 194       | 167                              | 32.38                                  | 0.182               |
| Total                       | 100.00             | -         | -                                | 155.71                                 | -                   |
| Correct total <sup>b)</sup> |                    |           |                                  | 167.64                                 |                     |

a) During CPS and EPS synthesis process, addition of one monosaccharide is accompanied with one and a half H<sub>2</sub>O loss, so the modified molar mass = molar mass of monosaccharide – 1.5 × molar mass of water.

b) In CPS and EPS, 28.4% of all the glycosyl is acetylated and the acetyl donor is acetyl-CoA, so the added molar mass by acetylation is 42 and the average molar mass of CPS or EPS monomer is  $155.71 \times (1-28.4\%) + (155.71+42) \times 28.4\%$  = 167.64. In the biomass, acetyl component of CPS and EPS is  $15.7\% \times 28.4\% \times 1000/167.64 = 0.266$  mmol/g DW.

## 9 Total component proportions of *B. diazoefficiens* biomass

In summary, the same components were combined, and the total component proportions of *B. diazoefficiens* biomass were shown in Table 8.

**Table 8 Total component proportions of *B. diazoefficiens* biomass**

| Component | Content (mmol/g DW) | Component | Content (mmol/g DW) |
|-----------|---------------------|-----------|---------------------|
| L-Ala     | 0.568               | dTMP      | 0.0175              |
| L-Arg     | 0.2                 | AMP       | 0.0631              |
| L-Asn     | 0.21                | CMP       | 0.0649              |
| L-Asp     | 0.21                | GMP       | 0.0817              |

|       |        |               |         |
|-------|--------|---------------|---------|
| L-Cys | 0.023  | UMP           | 0.0531  |
| L-Gln | 0.242  | PE            | 0.0071  |
| L-Glu | 0.242  | PC            | 0.00422 |
| Gly   | 0.433  | PG            | 0.00197 |
| L-His | 0.074  | CL            | 0.00048 |
| L-Ile | 0.21   | Arabinose     | 0.0121  |
| L-Leu | 0.345  | Fucose        | 0.0434  |
| L-Lys | 0.419  | Galactose     | 0.177   |
| L-Met | 0.126  | Galacturonate | 0.1942  |
| L-Phe | 0.172  | Glucosamine   | 0.0049  |
| L-Pro | 0.177  | Glucose       | 0.4053  |
| L-Ser | 0.293  | Mannose       | 0.2223  |
| L-Thr | 0.251  | Xylose        | 0.0126  |
| L-Trp | 0.023  | KDO           | 0.0027  |
| L-Tyr | 0.126  | Lipid A       | 0.0058  |
| L-Val | 0.317  | PHB           | 1.8488  |
| dAMP  | 0.0175 | Peptidoglycan | 0.0262  |
| dCMP  | 0.0311 | Acetyl-CoA    | 0.266   |
| dGMP  | 0.0311 |               |         |

## 10 GAM and NGAM of *B. diazoefficiens*

GAM of the biomass reaction was mainly composed of the energy consumption related to the biosynthesis of biomacromolecules such as proteins, nucleic acids and polysaccharides. Biosynthesis of biomacromolecules related to the GAM in our model includes proteins, DNA, RNA, polysaccharide side chains of LPS, CPS and EPS. Energy consumption related to the biosynthesis of proteins, DNA and RNA in *B. diazoefficiens* have been detected (6). During the synthesis process of CPS, EPS and polysaccharide side chains of LPS, addition of one monosaccharide is accompanied with three high energy bonds consumption. Composition and proportion of *B. diazoefficiens* GAM were shown in Table 9.

**Table 9 Composition and proportion of *B. diazoefficiens* GAM**

| Component | wt%   | Total mmol | mmol ATP/mmol | Total  |
|-----------|-------|------------|---------------|--------|
| Protein   | 0.501 | 4.6610     | 4.324         | 20.154 |
| DNA       | 0.030 | 0.0972     | 3.365         | 0.327  |
| RNA       | 0.085 | 0.2628     | 2.406         | 0.632  |
| LPS       | 0.034 | 0.1375     | 3             | 0.413  |
| CPS & EPS | 0.157 | 0.9370     | 3             | 2.811  |
| Total     | -     | -          | -             | 24.337 |

Generally, NGAM requirements are hard to be accurately estimated and often represented in metabolic models by the reaction  $\text{ATP} + \text{H}_2\text{O} \Rightarrow \text{ADP} + \text{Pi} + \text{H}^+$  whose lower bound was set as the NGAM. A proper reference value of NGAM could not be found in the metabolic models of closely

related species, so the metabolic model of *E. coli*, iJO1366, was consulted (18), whose NGAM is 3.0 mmol\*gDW<sup>-1</sup>\*h<sup>-1</sup>.

## 11 The determined biomass reaction

In sum, the determined biomass reaction for *B. diazoefficiens* USDA110 is:

0.266 Acetyl-CoA[c] + 0.568 L-Ala[c] + 0.0631 AMP[c] + 0.0121 Arabinose[c] + 0.2 L-Arg[c] + 0.21 L-Asn[c] + 0.21 L-Asp[c] + 24.337 ATP[c] + 0.00048 CL[c] + 0.0649 CMP[c] + 0.023 L-Cys[c] + 0.0175 dAMP[c] + 0.0311 dCMP[c] + 0.0311 dGMP[c] + 0.0175 dTMP[c] + 0.0434 Fucose[c] + 0.177 Galactose[c] + 0.1942 Galacturonate[c] + 0.242 L-Gln[c] + 0.0049 Glucosamine[c] + 0.4053 Glucose[c] + 0.242 L-Glu[c] + 0.433 Gly[c] + 0.0817 GMP[c] + 15.885 H<sub>2</sub>O[c] + 0.074 L-His[c] + 0.21 L-Ile[c] + 0.0027 KDO[c] + 0.345 L-Leu[c] + 0.0058 Lipid A[c] + 0.419 L-Lys[c] + 0.2223 Mannose[c] + 0.126 L-Met[c] + 0.00422 PC[c] + 0.0071 PE[c] + 0.0262 Peptidoglycan[c] + 0.00197 PG[c] + 1.8488 PHB[c] + 0.172 L-Phe[c] + 0.177 L-Pro[c] + 0.293 L-Ser[c] + 0.251 L-Thr[c] + 0.023 L-Trp[c] + 0.126 L-Tyr[c] + 0.0531 UMP[c] + 0.317 L-Val[c] + 0.0126 Xylose[c] → 24.337 ADP[c] + 0.266 CoA[c] + 24.337 H[c] + 24.337 Pi[c]

## References

1. T. Bisseling, R. C. van Den Bos and A. van Kammen, *Microbiology*, 1977, **101**, 79-84.
2. F. J. Bergersen, *Microbiology*, 1958, **19**, 812-823.
3. S. A. Kim and L. Copeland, *Appl. Environ. Microb.*, 1996, **62**, 4186-4190.
4. T. Gerson and J. J. Patel, *Appl. Microbiol.*, 1975, **30**, 193-198.
5. A. Fabra, J. Angelini, A. Donolo, M. Permgiani and S. Castro, *Anton. Leeuw. Int. J. G.*, 1998, **73**, 223-228.
6. I. Thiele and B. Ø. Palsson, *Nat. Protoc.*, 2010, **5**, 93-121.
7. W. X. Chen and E. T. Wang, *Chinese Rhizobia*, Science Press, 2011.
8. M. A. Islam, E. A. Edwards and R. Mahadevan, *PLoS Comput. Biol.*, 2010, **6**, e1000887.
9. T. T. Lillich and G. H. Elka, *J. Appl. Bact.*, 1973, **36**, 315-319.
10. T. Kaneko, Y. Nakamura, S. Sato, K. Minamisawa, T. Uchiumi, S. Sasamoto, A. Watanabe, K. Idesawa, M. Iriguchi, K. Kawashima, M. Kohara, M. S. Matsumoto, S. Shimpo, H. Tsuruoka, T. Wada, M. Yamada and S. Tabata, *DNA Res.*, 2002, **9**, 189-197.
11. T. Kampers, P. Friedhoff, J. Biernat, E. M. Mandelkow and E. Mandelkow, *FEBS Lett.*, 1996, **399**, 344-349.
12. M. C. Hansen, A. K. Nielsen, S. Molin, K. Hammer and M. Kilstrup, *J. Bacteriol.*, 2001, **183**, 4747-4751.
13. A. J. Westermann, S. A. Gorski and J. Vogel, *Nat. Rev. Microbiol.*, 2012, **10**, 618-630.
14. P. S. Miclea, M. Péter, G. Végh, G. Cinege, E. Kiss, G. Váró, I. Horváth and I. Dusha, *Mol. Plant. Microbe. In.*, 2010, **23**, 638-650.
15. V. Puvanesarajah, F. M. Schell, D. Gerhold and G. Stacey, *J. Bacteriol.*, 1987, **169**, 137-141.
16. J. M. Andrew and D. B. Wolfgang, *Plant Physiol.*, 1980, **66**, 158-163.
17. K. Minamisawa, *Plant Cell Physiol.*, 1989, **30**, 877-884.
18. J. D. Orth, T. M. Conrad, J. Na, J. A. Lerman, H. Nam, A. M. Feist and B. Ø. Palsson, *Mol. Syst. Biol.*, 2011, **7**, 535-543.

## Supplementary files

**Supplementary file S1.** Important information during the reconstruction of metabolic network of *B. diazoefficiens* USDA110, including reaction sources, genome annotation, details of reactions and metabolites and the gaps unable to be filled. (XLS)

**Supplementary file S2.** Detailed results of the phenotypic microarray experiment and corresponding in silico predictions. (XLS)

**Supplementary file S3.** The reconstructed genome-scale metabolic network model of *B. diazoefficiens* USDA110, iYY1101. (XML)

**Supplementary file S4.** The constraint-based metabolic network model of *B. diazoefficiens* USDA110 specific for the FL state. (XML)

**Supplementary file S5.** The constraint-based metabolic network model of *B. diazoefficiens* USDA110 specific for the SNF state. (XML)

**Supplementary file S6.** Detailed results of simulation including essentiality analysis for genes and reactions and metabolic control analysis. (XLS)
